# Supplementary material
Source: publisher figshare collection journal article supplement (https://karger.figshare.com/ndownloader/files/30457458)
Supplement: Supplementary file 1 [file 30457458]

| **Supplementary table**  **Pregnancy outcome of subfertile women undergoing ICSI (%, 95% CI)**  **Natural Logarithm (LN) TSH** | | | | | | | |
| --- | --- | --- | --- | --- | --- | --- | --- |
| **All women n=752** | | | | | | | |
| Biochemical pregnancy | *Cumu lative* | OR LN TSH | 0.10 90.72-1.38) | 0.98 | Adjusted OR LN TSH | 1.1 (0.73-1.43) | 0.91 |
| quadratic term added | 0.78 (0.44-1.37)  1.31 (0.79-2.16) | 0.38  0.38 | quadratic term added | 0.75 (0.41-1.37)  1.38 (0.82-2.33) | 0.35  0.23 |
| Clinical pregnancy | *Cumu lative* | OR LN TSH | 0.99 (0.70-1.39) | 0.94 | Adjusted OR LN TSH | 0.99 (0.69-1.40) | 0.94 |
| quadratic term added | 1.71 (0.38-1.35)  1.41 (0.81-2.47) | 0.30  0.23 | quadratic term added | 0.64 (0.33-1.25)  1.57 (0.88-2.78) | 0.19  0.13 |
| Pregnancy loss | *Cumu lative* | OR LN TSH | 0.80 (0.49-1.32) | 0.39 | Adjusted OR LN TSH | 0.83 (0.50-1.37) | 0.46 |
| quadratic term added | 0.65 (0.31-1.39)  1.29 (0.63-2.60) | 0.27  0.49 | quadratic term added | 0.73 (0.33-1.63)  1.15-0.55-2.37) | 0.48  0.71 |
| Ongoing pregnancy | *Cumu lative* | OR LN TSH | 1.16 (0.84-1.61) | 0.36 | Adjusted OR LN TSH | 1.15 (0.81-1.62) | 0.43 |
| quadratic term added | 1.15 (0.65-2.03)  1.01 (0.61-1.68) | 0.63  0.96 | quadratic term added | 1.05 (0.57-1.92)  1.10 (0.65-1.88) | 0.78  0.48 |
| Live birth | *Cumu lative* | OR LN TSH | 1.29 (0.93-1.78) | 0.13 | Adjusted OR LN TSH | 1.28 (0.91-1.79) | 0.16 |
| quadratic term added | 1.25 (0.71-2.19)  1.03 (0.63-1.71) | 0.44  0.90 | quadratic term added | 1.16 (0.63-2.13)  1.11 (0.65-1.89) | 0.63  0.71 |
| **Primary subfertile women n=455** | | | | | | | |
| Biochemical pregnancy | *Cumu lative* | OR LN TSH | 1.12 (0.73-1.72) | 0.59 | Adjusted OR LN TSH | 1.18 (90.76-1.84) | 0.46 |
| quadratic term added | 0.80 (0.37-1.72)  1.42 (0.73-2.76) | 0.57  0.30 | quadratic term added | 0.83 (0.36-1.90)  1.43 (0.70-2.92) | 0.66  0.33 |
| Clinical pregnancy | *Cumu lative* | OR LN TSH | 1.25 (0.79-1.96) | 0.35 | Adjusted OR LN TSH | 1.27 (0.79-2.03) | 0.33 |
| quadratic term added | 0.75 (0.31-1.84)  1.71 (0.77-3.78) | 0.53  0.18 | quadratic term added | 0.70 (0.28-1.80)  1.84 (0.81-4.18) | 0.46  0.14 |
| Pregnancy loss | *Cumu lative* | OR LN TSH | 0.67 (0.34-1.31) | 0.24 | Adjusted OR LN TSH | 0.63 (0.31-1.26) | 0.19 |
| quadratic term added | 1.44 (0.35-5.94)  0.41 (0.11-1.54) | 0.62  0.19 | quadratic term added | 1.44 (0.33-6.30)  0.39 (0.10-1.54) | 0.63  0.18 |
| Ongoing pregnancy | *Cumu lative* | OR LN TSH | 1.50 (0.96-2.32) | 0.07 | Adjusted OR LN TSH | 1.51 (0.95-2.39) | 0.08 |
| quadratic term added | 0.91 (0.40-2.07)  1.72 (0.82-3.61)) | 0.82  0.15 | quadratic term added | 0.85 (0.35-2.03)  1.84 (0.85-3.98) | 0.71  0.12 |
| Live birth | *Cumu lative* | OR LN TSH | 1.66 (1.07-2.57) | 0.02 | Adjusted OR LN TSH | 1.66 (1.05-2.63) | 0.03 |
| quadratic term added | 0.98 (0.44-2.17)  1.79 (0.86-3.72) | 0.95  0.12 | quadratic term added | 0.91 (0.38-2.14)  1.89 (0.88-4.09) | 0.82  0.10 |
| **Secondary subfertile women n=297** | | | | | | | |
| Biochemical pregnancy | *Cumu lative* | OR LN TSH | 0.79 (0.47-1.32) | 0.37 | Adjusted OR LN TSH | 0.76 (0.44-1.31) | 0.32 |
| quadratic term added | 0.69 (0.30-1.60)  1.18 (0.54-2.55) | 0.38  0.68 | quadratic term added | 0.55 (0.23-1.33) | 0.18  0.37 |
| Clinical pregnancy | *Cumu lative* | OR LN TSH | 0.70 (0.42-1.18) | 0.18 | Adjusted OR LN TSH | 0.67 (0.39-1.16) | 0.15 |
| quadratic term added | 0.62 (0.24-1.57)  1.15 (0.51-2.59) | 0.31  0.74 | quadratic term added | 0.47 (0.18-1.22)  1.49 (0.64-3.45) | 0.12  0.36 |
| Pregnancy loss | *Cumu lative* | OR LN TSH | 1.10 (0.52-2.33) | 0.81 | Adjusted OR LN TSH | 1.20 (0.56-2.59) | 0.65 |
| quadratic term added | 0.39 (0.14-1.13)  3.40 (1.28-9.18) | 0.08  0.02 | quadratic term added | 0.46 (0.14-1.54)  2.99 (1.03-8.75) | 0.21  0.045 |
| Ongoing pregnancy | *Cumu lative* | OR LN TSH | 0.80 (0.49-1.31) | 0.37 | Adjusted OR LN TSH | 0.73 (0.43-1.25) | 0.26 |
| quadratic term added | 1.34 (0.58-3.09)  0.56 (0.26-1.20) | 0.50  0.14 | quadratic term added | 1.09 (0.44-2.72)  0.64 (0.28-1.46) | 0.85  0.29 |
| Live birth | *Cumu lative* | OR LN TSH | 0.87 (0.53-1.43) | 0.59 | Adjusted OR LN TSH | 0.83 (0.49-1.39) | 0.47 |
| quadratic term added | 1.48 (0.63-3.44)  0.56 (0.26-1.20) | 0.37  0.13 | quadratic term added | 1.25 (0.50-3.13)  0.63 (0.28-1.43) | 0.63  0.27 |
| Biochemical pregnancy hCG levels > 5U/L on day 14-16 after ovulation, so including biochemical pregnancies not coming to a clinical pregnancy. Clinical pregnancy is defined as intrauterine pregnancy at 6-7 weeks. Ongoing pregnancy is defined as an intrauterine pregnancy with beating hart at 10-11 weeks of amenorrhea. Live birth is defined as a healthy living child born > 24 weeks. Pregnancy loss is defined as a clinical pregnancy that is not viable.  #Adjusted for confounding factors age, BMI, alcohol use, tobacco use, diminished ovarian reserve (ovulatory cycles with FSH>10 U/l) *.  LN = natural logarithm; Quadratic term added showed no significance, only in secondary subfertile women-pregnancy loss; in interquartile analysis no significance appeared. | | | | | | | |
